# Supplementary material for: Electrodeposition model with dynamic ion diffusion coefficients for predicting void defects in electroformed microcolumn arrays
Source: Royal Society of Chemistry journal article supplement (doi:10.1039/d2cp05396a), 2023-01-01
Supplement: d2cp05396a1.pdf [file d2cp05396a1.pdf]

Supplementary material for :

**Electrodeposition model with dynamic ion diffusion coefficient for predicting void defect in electroformed microcolumn array**

Zhigao Ma <sup>a,b</sup>, Bingyan Jiang <sup>a,b,\*\*</sup>, Yanzhuo Dong <sup>a,b</sup>, Jun Qiang <sup>a,b</sup>, Dietmar Drummer <sup>c</sup>, Lu Zhang <sup>a,b,\*</sup>

a School of Mechanical and Electrical Engineering, Central South University, Changsha 410083, China

b State Key Laboratory of High Performance Complex Manufacturing, Changsha 410083, China

c Institute of Polymer Technology, Friedrich-Alexander-University Erlangen-Nuremberg, Am Weichselgarten 9, D-91058 Erlangen, Germany

\*Corresponding author. E-mail address: [zhangl@csu.edu.cn](mailto:zhangl@csu.edu.cn)

\*\*Corresponding author. E-mail address: [jby@csu.edu.cn](mailto:jby@csu.edu.cn)

The supplementary materials contain 2 pages, including 1 figure.

Part1: Fabrication of microelectrodes with different aspect ratios

The microcolumn array with a depth of 60  $\mu\text{m}$  and widths of 24, 30, 40, 60, 90 and 120  $\mu\text{m}$  were fabricated by soft lithography. The specific experimental steps are as follows. First, using anhydrous ethanol and deionized water to clean the 8K mirror-polished stainless steel substrate, and placed it on a 120  $^{\circ}\text{C}$  glue baking table for 10 minutes. According to the SU-8 3025 photoresist instruction manual to determine the process parameters, SU-8 spined at 500 rpm for 10 s with acceleration of 100 rpm/second and spined at 1300 rpm for 30 s with acceleration of 300 rpm/second, and SU-8 layer with a thickness of about 60  $\mu\text{m}$  was obtained. The devices were baked on a hot plate at 95  $^{\circ}\text{C}$  for 15 min, and exposed on a UV lithography machine (URE-2000/35L) at an exposure dose of 230  $\text{mJ}/\text{cm}^2$ , and the structure of the mask was copied to the photoresist layer. The substrate was placed on a drying table at 65 and 95  $^{\circ}\text{C}$  for 1 min and 5 min, respectively. Finally, it was developed in PGMEA developer solution for 6 min, and washed with isopropanol solution.

Part2: Polarization curves of microchannels with a depth of 60  $\mu\text{m}$  and an aspect ratio of 2.5:1 to 1:2

The polarization curves of the microchannels with different aspect ratios

mentioned above were tested repeatedly. The stirring speed is 400 r/min, the scanning speed was 0.04 V/s, the sampling interval was 0.005 V, and the start and end potentials were -0.3 V and -1.8 V, respectively. The sensitivity is set to  $10^{-2}$  A/V.

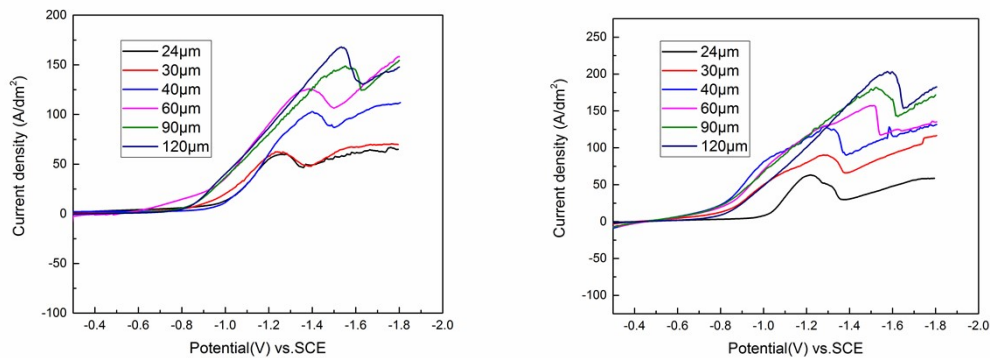

Fig. S.1. The experimental polarization curve of microchannels with different aspect ratio (2.5:1 to 1:2)
